# Supplementary material for: Treatment with DHA Improves Epidermal Eeratinocyte Differentiation and Ameliorates Inflammation in Human Keratinocytes and Reconstructed Human Epidermis Models
Source: Preprints.org preprint supplement (doi:10.20944/preprints201908.0178.v1), 2019-08-16
Supplement: Supplementary file 1 [file supplementary]

1

Table S1. Primers for qPCR.

| Primer          | Sequences (5'-3')         | Gene bank ID |
|-----------------|---------------------------|--------------|
| IL6 F           | ACTCACCTCTTCAGAACGAATTG   | NM_000600.5  |
| IL6 R           | CCATCTTTGGAAGGTTTCAGGTTG  |              |
| IL-1 $\alpha$ F | ATGGCCAAAGTTCGAGACATG     | NM_000575.4  |
| IL-1 $\alpha$ R | CTACGCCTGGTTTTCCAGTATCTGA |              |
| TNF $\alpha$ F  | ATGAGCACTGAAAGCATGATCC    | NM_000594.4  |
| TNF $\alpha$ R  | GAGGGCTGATTAGAGAGAGGTC    |              |
| FLG F           | GCAAGGTCAAGTCCAGGAGA      | NM_00206.1   |
| FLG R           | CCCTCGGTTTCCACTGTCTC      |              |
| LOR F           | GAGTTGGAGGTGTTTTCCAGGG    | NM_000427.3  |
| LOR R           | GCAGAACTAGATGCAGCCGGA     |              |
| IVL F           | TAACCACCCGCAGTGTCCAG      | NM_005547.3  |
| IVL R           | ACAGATGAGACGGGCCACCTA     |              |
| GADPH F         | GAAGGTCGGAGTCAACGGATT     | NM_002046.7  |
| GADPH R         | TGACGGTGCCATGGAATTTG      |              |

2

3

Table S2. Formula Composition.

| Ingredient       | Content (%) |
|------------------|-------------|
| carbomer         | 1%          |
| Propylene glycol | 15%         |
| water            | 100%        |
| DHA              | 0.1%        |

4

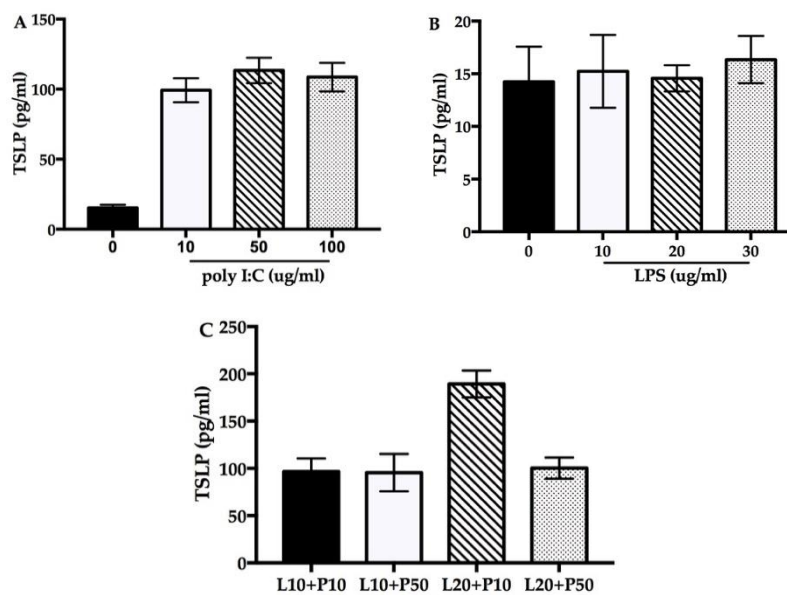

5

6

7

8

9

**Figure S1.** Effect of poly I:C, LPS and cocktail on the TSLP secretion in NHEK cells. The changes of TSLP were accessed by ELISA. (A) Effects of poly (I:C) on the TSLP secretion. (B) Effects of LPS on the TSLP secretion. (C) Effects of LPS + poly (I:C) on the TSLP secretion. Data are expressed as mean

10 ± standard deviation (SD). Cocktail, LPS + poly (I:C); L, LPS, lipopolysaccharide; P, poly I:C,  
11 polyinosinic-polycytidylic acid; TSLP, Thymic stromal lymphopoietin.

## 12 **Methods**

13 LPS and poly I:C, we determined the optimum concentrations for subsequent studies. NHEK  
14 cells ( $6 \times 10^3$  cells/well) were seeded in 96-well plates (Nunc, Thermofisher scientific, MA, USA) and  
15 treated with different concentrations of poly I:C, LPS and poly (I:C) + LPS for 24 h according to the  
16 results of cells viability. We define the best concertation of LPS plus poly I:C by measuring the  
17 expression of TSLP. The supernatant of NHEK cells were collected from the 6-wells plates. Thymic  
18 stromal lymphopoietin (TSLP) were determined by using ELISA kits (R&D, Minnesota, USA). The  
19 tests were performed strictly according to the manufacturer's instructions.

## 20 **Results**

21 Finally, we combined 20 ug/ml LPS and 10 ug/ml poly (I:C) for 24 hours and found that the  
22 expression of TSLP in cocktail was significantly higher than another mixed group.
